# Supplementary material for: Synthesis of maleic and fumaric acids from furfural in the presence of betaine hydrochloride and hydrogen peroxide
Source: Royal Society of Chemistry journal article supplement (doi:10.1039/c6gc02620f), 2016-11-01
Supplement: c6gc02620f1.pdf [file c6gc02620f1.pdf]

## **Synthesis of maleic and fumaric acids from furfural in the presence of betaine hydrochloride and hydrogen peroxide**

N. Araji,<sup>a</sup> D. D. Madjinza,<sup>a</sup> G. Chatel,<sup>a\*</sup> A. Moores,<sup>b</sup> F. Jérôme<sup>a</sup> and K. De Oliveira Vigier<sup>a\*</sup>

<sup>a</sup> IC2MP UMR CNRS 7285, Université de Poitiers, ENSIP, B1, 1 rue Marcel Doré TSA 41105, 86073 Poitiers Cedex 9, France, E-mail: [karine.vigier@univ-poitiers.fr](mailto:karine.vigier@univ-poitiers.fr) and [gregory.chatel@univ-poitiers.fr](mailto:gregory.chatel@univ-poitiers.fr)

<sup>b</sup> Centre for Green Chemistry and Catalysis, Department of Chemistry, McGill University, 801 Sherbrooke St. W., Montreal, Canada.

### **General procedure for the oxidation of furfural to maleic and fumaric acids**

Typically 0.5 g of furfural was added in a flask, in the presence of 5 g of water and 10 eq. of H<sub>2</sub>O<sub>2</sub> (30%) and 2.5 eq. of BHC. The reaction was heated up to 90 °C. After the reaction, the medium was collected for analysis.

### **Analysis of furfural, maleic acid (MA), fumaric acid (FA) and 2-furanone**

Furfural was analyzed using a GC equipment from BRUKER, equipped with a FID detector and a split/splitless injector. The column used was a CPWAX 52, 50 m. The calibration was performed by internal standard using DMSO.

MA, FA and 2-furanone were quantified by external calibration at 25 °C using a HPLC equipped with a ICE-Coragel 107H, a Varian Prostar UV-VIS detector, Varian Prostar pumps (model 210) and a mixture water/H<sub>2</sub>SO<sub>4</sub> (90:10) as mobile phase (0.6 mL.min<sup>-1</sup>). The wave length was 210 nm.

### **Recycling experiment**

The reaction was carried out as mentioned before. After 30 min of reaction, the reaction medium was cooled down to room temperature. Acetone with a high purity was added to precipitate BHC. By filtration BHC was recovered and dried in an oven at 60 °C and was then used for another cycle.

## Analysis of BHC after recycling

The BHC recovered after the 6<sup>th</sup> cycle was analyzed by <sup>1</sup>H NMR and it was shown that the NMR spectra was the same that the NMR spectra of commercial BHC.

### a) BHC after recycling

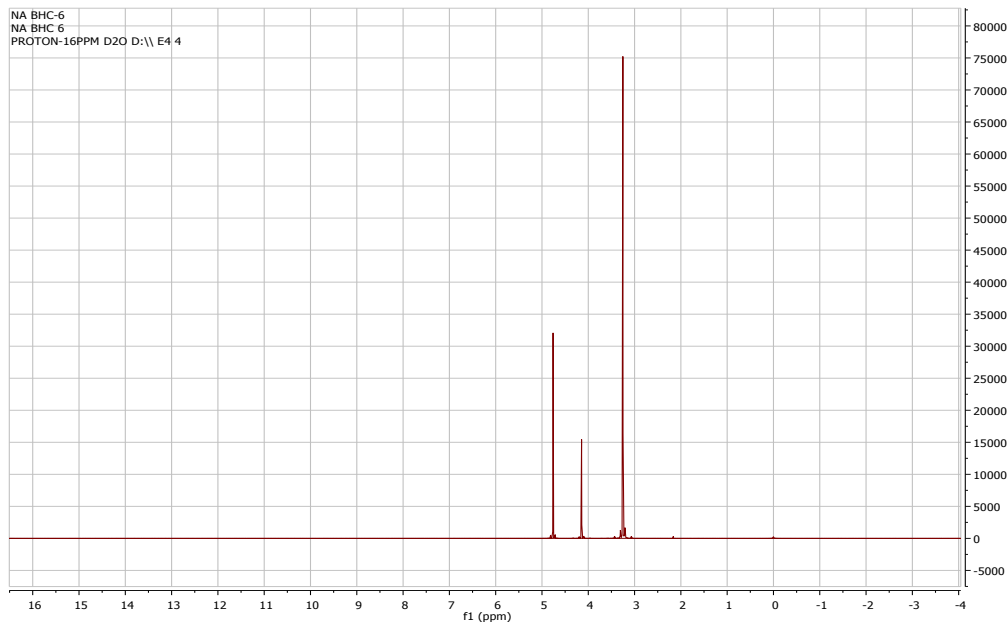

### b) Commercial BHC

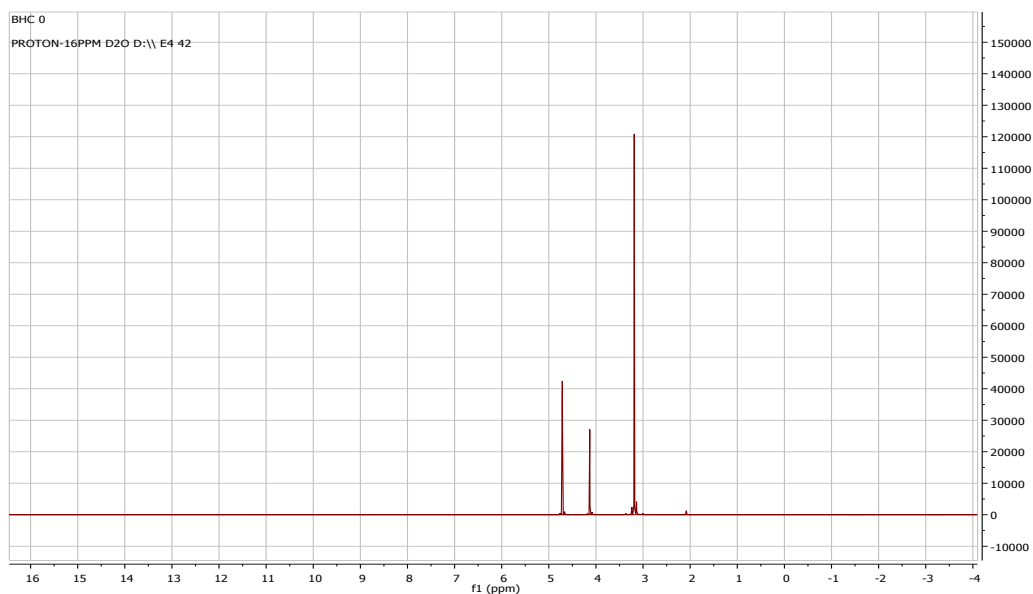

Figure S1: a) <sup>1</sup>H NMR spectra of BHC recovered after the 5<sup>th</sup> recycling <sup>1</sup>H NMR are recorded on a 400 MHz Bruker Advance DPX spectrometer using D<sub>2</sub>O as solvent. Comparison with b) commercial BHC.
